# Supplementary material for: The Independent Domestication of Timopheev’s Wheat: Insights from Haplotype Analysis of the Brittle rachis 1 (BTR1-A) Gene
Source: Genes (Basel). 2021 Feb 25;12(3):338. doi: 10.3390/genes12030338 (PMC7996576; doi:10.3390/genes12030338)
Supplement: Supplementary file 1 [file genes-12-00338-s001.xlsx]

## Sheet: Table S1
Table S1. Distribution and phenotypic assessment of the 59 genotypes (including Zavitan and Svevo controls) used for haplotype analysis
GENOTYPE	GENUS	SPECIES	SUBSP	COUNTRY	SITE	LAT	LONG	PHENOTYPE
WEW-11(ZV)	Triticum	turgidum	dicoccoides	ISRAEL	Yehudia	32.9591	35.7151	Brittle
DW-1(SV)	Triticum	turgidum	durum	ITALY		44.3651	11.3111	Non-brittle
DEW-10479	Triticum	turgidum	subsp. dicoccum	TURKEY	Urfa; 5 km N of Urfa	37.2	38.7833	Non-brittle
DEW-10484	Triticum	turgidum	subsp. dicoccum	OMAN	Ad Batinah; 60 km SW of Sohar	23.85	56.5167	Non-brittle
DEW-10489	Triticum	turgidum	subsp. dicoccum	JORDAN	Al Balqa; Al-Zֳ¡tary	32.0667	35.75	Semi-brittle
DEW-10501	Triticum	turgidum	subsp. dicoccum	ARMENIA	Geghar'kunik'; Vayotsdzor; Gonzah	39.6833	45.3167	Non-brittle
DEW-10503	Triticum	turgidum	subsp. dicoccum	ISRAEL	Palestine; Collected in Ancient Palestine	31.7171	35.196	Non-brittle
DEW-10516	Triticum	turgidum	subsp. dicoccum	YEMEN	Dhamar; 12 km N of Dhamar	14.65	44.35	Non-brittle
TRG-144	Triticum	turgidum	subsp. turgidum	USA	Missouri; University of Missouri Columbia	38.9404	-92.3277	Non-brittle
TRG-10453	Triticum	turgidum	subsp. turgidum var. salomonis	MAYOTTE	Unknown	-12.8275	45.1662	Non-brittle
TRG-10458	Triticum	turgidum	subsp. turgidum	AFGHANISTAN	Herat; Mill in Herat	34.3333	62.5167	Non-brittle
TRG-10543	Triticum	turgidum	subsp. turgidum	ETHIOPIA	Unknown	7.15304	39.7289	Non-brittle
TRN-2805	Triticum	turgidum	subsp. turanicum var. orientale	SOVIET UNION	Unknown	56.3485	33.7198	Non-brittle
TRN-10531	Triticum	turgidum	subsp. turanicum	TURKEY	Afyon; Dinar	38.9833	30.5333	Non-brittle
TRN-10534	Triticum	turgidum	subsp. turanicum	TURKEY	Adana; Kozan	37.45	35.7833	Non-brittle
TRN-10535	Triticum	turgidum	subsp. turanicum	PORTUGAL	Aveiro; Arrancada	40.6167	-8.41667	Non-brittle
POL-10524	Triticum	turgidum	subsp. polonicum	PORTUGAL	Aveiro	40.6167	-8.41667	Non-brittle
POL-10526	Triticum	turgidum	subsp. polonicum	ETHIOPIA	Unknown	10.2477	40.7616	Non-brittle
POL-10857	Triticum	turgidum	subsp. polonicum	PORTUGAL	Aveiro; Arrancada	40.6167	-8.41667	Non-brittle
CRT-2812	Triticum	turgidum	subsp. carthlicum var. fuliginosum	SOVIET UNION	Unknown	55.1239	36.818	Non-brittle
CRT-2868	Triticum	turgidum	subsp. carthlicum	SPAIN	Unknown	41.8671	-3.01618	Non-brittle
CRT-2870	Triticum	turgidum	subsp. carthlicum	HUNGARY	Pest; National Institute for Agrobotany; Tapiozele	47.4167	19.3333	Non-brittle
CRT-10460	Triticum	turgidum	subsp. carthlicum	TURKEY	Kars; 1 km W of highway junction to 'cave art' located 1 km W of Camuslu village	40.1761	43.0492	Non-brittle
CRT-10471	Triticum	turgidum	subsp. carthlicum	TURKEY	Kars; 19 km N of Gole	40.9167	42.6167	Non-brittle
PLC-2810	Triticum	turgidum	subsp. paleocolchicum	SOVIET UNION	Unknown	55.846	33.9615	Non-brittle
WTW-6	Triticum	timopheevii	subsp. armeniacum	TURKEY	Tunceli; 17 km S of Tunceli	39.0053	39.4883	Brittle
WTW-23	Triticum	timopheevii	subsp. armeniacum	IRAQ	Arbil; 4 km NE of Shaqlawah [50]	36.4167	44.3667	Brittle
WTW-25	Triticum	timopheevii	subsp. armeniacum	IRAQ	Dahuk; 6 km E of Suara Tuka [57]	37	43.2167	Brittle
WTW-44	Triticum	timopheevii	subsp. armeniacum var. tumaniani	ARMENIA	Unknown	40.3561	44.441	Brittle
WTW-48	Triticum	timopheevii	subsp. armeniacum var. pseudoboeoticum f. boeoticumo	AZERBAIJAN	Naxcivan; Kapach-Tape	39.25	45.5	Brittle
WTW-49	Triticum	timopheevii	subsp. armeniacum var. tumaniani	AZERBAIJAN	Naxcivan; Nakhichevan; near Andon-Uchan Mountain	39.25	45.5	Brittle
WTW-101	Triticum	timopheevii	subsp. armeniacum	IRAN	Kermanshah; 47 km NW of Eslamabad (Shahabad) to Sar-e-Pol-e-Zahab [75]	34.31	46.1838	Brittle
WTW-102	Triticum	timopheevii	subsp. armeniacum	IRAQ	Arbil; 1 km NE of Salahadin [48]	36.4	44.2	Semi-brittle
WTW-105	Triticum	timopheevii	subsp. armeniacum	ARMENIA	Kotayk; Abovian Region	40.268	44.599	Brittle
WTW-145	Triticum	timopheevii	subsp. armeniacum	IRAQ	Arbil; 2 km NW of Salahadin [49]	36.4	44.2333	Brittle
WTW-153	Triticum	timopheevii	subsp. armeniacum	IRAQ	Arbil; 4 km NE of Shaqlawah [50]	36.4167	44.3667	Brittle
WTW-170	Triticum	timopheevii	subsp. armeniacum	IRAQ	As Sulaymaniyah; 19 km E of As-Sulaymaniyah to Chuarta [66]	35.7159	45.5493	Brittle
WTW-461	Triticum	timopheevii	subsp. armeniacum	IRAQ	Dahuk; 24 km NE of Dahuk to Al-'Amadiyah [55]	36.9667	43.1833	Brittle
WTW-861	Triticum	timopheevii	subsp. armeniacum	IRAQ	Arbil; 1 km NE of Salahadin [48]	36.4	44.2	Brittle
WTW-877	Triticum	timopheevii	subsp. armeniacum	IRAQ	Arbil; 4 km NE of Shaqlawah [50]	36.4167	44.3667	Brittle
WTW-892	Triticum	timopheevii	subsp. armeniacum	IRAQ	Arbil; 21 km S of Harir; between Rawanduz and Shaqlawah [52]	36.4167	44.3667	Brittle
WTW-905	Triticum	timopheevii	subsp. armeniacum	IRAQ	As Sulaymaniyah; 43 km NW of As-Sulaymaniyah near Surdash [62]	35.8384	45.0831	Brittle
WTW-921	Triticum	timopheevii	subsp. armeniacum var. nachitchevanicum	IRAQ	Arbil; 19.1 km W of Shaqlawah to Arbil (Irbil)	36.3367	44.1695	Brittle
WTW-946	Triticum	timopheevii	subsp. armeniacum	IRAQ	Dahuk; 3-4 km W of Mazorka Gorge; E of Suara Tuka [58]	36.9833	43.2	Brittle
WTW-1008	Triticum	timopheevii	subsp. armeniacum	TURKEY	Kahramanmaras; 40 km S of Maras to Giziantep	37.2872	37.1942	Brittle
WTW-1486	Triticum	timopheevii	subsp. armeniacum var. kurdistanicum	IRAQ	Arbil; 1 km NE of Salahadin [48]	36.4	44.2	Brittle
WTW-1489	Triticum	timopheevii	subsp. armeniacum	IRAQ	Arbil; 1 km NE of Salahadin [48]	36.4	44.2	Brittle
WTW-1510	Triticum	timopheevii	subsp. armeniacum	IRAQ	Arbil; 4 km NE of Shaqlawah [50]	36.4167	44.3667	Brittle
WTW-1514	Triticum	timopheevii	subsp. armeniacum	IRAQ	Arbil; 7 km NE of Shaqlawah [51]	36.4238	44.3564	Brittle
WTW-1520	Triticum	timopheevii	subsp. armeniacum	IRAQ	Arbil; 21 km S of Harir; between Rawanduz and Shaqlawah [52]	36.4167	44.3667	Brittle
WTW-1521	Triticum	timopheevii	subsp. armeniacum	IRAQ	Dahuk; 5.5 km N of Dahuk [54]	36.9167	43.0333	Brittle
WTW-1526	Triticum	timopheevii	subsp. armeniacum	IRAQ	Dahuk; Between Zawiyah and Suara Tuka [59]	36.9667	43.1833	Brittle
WTW-1536	Triticum	timopheevii	subsp. armeniacum	IRAQ	As Sulaymaniyah; 16 km E of As-Sulaymaniyah to Chuarta [65]	35.6751	45.5328	Brittle
WTW-1564	Triticum	timopheevii	subsp. armeniacum	AZERBAIJAN	Naxcivan; Nakhichevan	39.25	45.5	Brittle
WTW-1565	Triticum	timopheevii	subsp. armeniacum var. nachitchevanicum	ARMENIA	Unknown	40.1297	44.7953	Brittle
WTW-1569	Triticum	timopheevii	subsp. armeniacum	ARMENIA	Shemakhynsky Pass	40.0911	44.1424	Brittle
WTW-1571	Triticum	timopheevii	subsp. armeniacum var. tumaniani	AZERBAIJAN	Unknown	40.2155	46.7158	Brittle
DTW-2729	Triticum	timopheevii	subsp. timopheevii var. albimilitinae (militinae)	DAGESTAN	Daghestan; Derbent	42.0674	48.2891	Non-brittle
DTW-2804	Triticum	timopheevii	subsp. timopheevii var. viticulosum	SOVIET UNION	Former USSR; Unknown	58.0952	37.2976	Non-brittle

## Sheet: Sheet2
Table S2. Primers used in attempts to amplify the BTR1-B gene region
Primer's name	Sequence
Btr13B-F1	GGGAGAGATGCGAGGGAAAA
Btr13B-R1	GTACTTAGCGCCTGGTACCT
Btr13B-F2	TGCGAGGGAAAAGTGTCAAG
Btr13B-R2	TTAGCGCCTGGTACCTTAGG
Btr13B-F3	TTGTGGTGGCATTGCACTTT
Btr13B-R3	CTTTTCTCGTTCGCTAGCCC
Btr13B-F4	CAAAATCACCTGGGAAGGGC
Btr13B-R4	GTGCACCATTCTATCGCTCG
Btr13B-F5	ATACCCATACCCACGAACCC
Btr13B-R5	CTGCTCTTCCATGGCTTGC
Btr13B-F6	AAGAAACGGCGGGAAAAGAC
Btr13B-R6	TGGTACATCTTCTTCCATTGCG
Btr13B-R6-1	ACTCCACCCTCTCTTTCTTCA
Btr13B-F7	GTCAAGAAACGGCGGGAAAA
Btr13B-R7	CCATGCATGACACAAAGTAGC
Btr13B-F8	CTGGCGACCTCTGGATGATA
Btr13B-R8	GACACTTTCCTCGACGCG
Btr13B-F9	CTCCCCATTACAACCAGCCT
Btr13B-R9	GGCGGCGACACTTTCCTC
Btr13B-F10	GGGAGGTAGTATCATGCGCT
Btr13B-R10	GCGCCATCTCTCTCTCTCTC
Btr13B-F11	TGAAGAAAGAGAGGGTGGAGT
Btr13B-R11	GCTCCCAGGTGTAGAAAGGT
Btr13B-F12	CTACTTTGTGTCATGCATGGC
Btr13B-R12	TCTCTTTCTCTCGGTGCACC
